# Supplementary material for: Navigating epoxidation complexity: building a data science toolbox to design vanadium catalysts
Source: Royal Society of Chemistry journal article supplement (doi:10.1039/d3nj05784d), 2024-01-01
Supplement: d3nj05784d1.pdf [file d3nj05784d1.pdf]

## SUPPORTING INFORMATION

### Navigating Epoxidation Complexity: Building a Data Science Toolbox to Design Vanadium Catalysts

*José Ferraz-Caetano<sup>1</sup>, Filipe Teixeira<sup>2</sup>, M. Natália D. S. Cordeiro<sup>1</sup>*

1) LAQV-REQUIMTE – Department of Chemistry and Biochemistry – Faculty of Sciences,  
University of Porto - Rua do Campo Alegre, S/N, 4169-007 Porto, Portugal

2) CQUM – Centre of Chemistry, University of Minho, Campus de Gualtar, 4710-057 Braga,  
Portugal

Corresponding Authors: **José Ferraz-Caetano** ([jose.caetano@fc.up.pt](mailto:jose.caetano@fc.up.pt))

**M. Natália D.S. Cordeiro** ([ncordeir@fc.up.pt](mailto:ncordeir@fc.up.pt))

## Model Database, Results and Code

The complete model database, with the list of compounds, model optimization features, full descriptor list and the repository for the sample code and data to produce the statistical results are available at the following online repository: <https://github.com/jfcaetano/ESA-Database>. Reactions were collected based on a literature review<sup>1</sup> found from 16 bibliographical sources<sup>2-17</sup>, featuring homogeneous catalyst reactions published across different research articles

## RDKit Full Descriptor List

Descriptors used in Machine Learning model development retrieved from RDKit software. The respective bibliographical foundation of each described is described in detail in the RDKit WebBook Documentation <sup>18</sup>. The descriptor calculations were made by converting each SMILES string (representing each molecular entry), running on top of Python version 3.9 <sup>19</sup> and using RDKit package, version 2022.09.4 <sup>20</sup>.

**Table S1**

List of Descriptors Used in Machine Learning model development

| Descriptor                 | Type         | Meaning                                                                                                                                                                           |
|----------------------------|--------------|-----------------------------------------------------------------------------------------------------------------------------------------------------------------------------------|
| BalabanJ                   | Structural   | Distance sum of the two end-vertex for each edge. BalabanJ index has been proven to be relevant to network branching.                                                             |
| BertzCT                    | Structural   | Complexity index, taking into account both the variety of kinds of bond connectivities and atom types; information contents related to bond connectivity and atom type diversity. |
| $0\chi$ , $1\chi$          | Structural   | This descriptor signifies a retention index (zero order) derived directly from gradient retention times.                                                                          |
| $0\chi_n - 4\chi_n$        | Structural   | This descriptor signifies a retention index (zero order) derived directly from gradient retention times.                                                                          |
| $0\chi_v - 4\chi_v$        | Structural   | This descriptor signifies atomic valence connectivity index (order 0).                                                                                                            |
| VSA_EState1 – VSA_EState11 | Surface Area | MOE-type (QSAR model) descriptors using EState indices and surface area contributions.                                                                                            |
| Hall Kier $\alpha$         | Structural   | Descriptor fingerprint that displays the difference between active and inactive molecules.                                                                                        |
| HeavyAtomCount             | Structural   | The number of heavy atoms in the molecule.                                                                                                                                        |

|                                     |            |                                                                             |
|-------------------------------------|------------|-----------------------------------------------------------------------------|
| <b>HeavyAtomMolWt</b>               | Structural | The average molecular weight of the molecule ignoring hydrogens.            |
| <b><math>K_1, K_2, K_3</math></b>   | Structural | This descriptor signifies # $\kappa$ shape index:<br>$(n-1) \times 2 / m^2$ |
| <b>Max and Min AbsEStateIndex</b>   | Electronic | Maximum and minimum Absolute E-State                                        |
| <b>Max and Min AbsPartialCharge</b> | Electronic | Maximum and minimum Absolute Partial Charge                                 |
| <b>Max and Min EStateIndex</b>      | Electronic | Maximum and minimum E-State                                                 |
| <b>Max and Min PartialCharge</b>    | Electronic | Maximum and minimum Partial Charge                                          |
| <b>Mol logP</b>                     | Structural | Wildman-Crippen logP value.                                                 |
| <b>MolMR</b>                        | Electronic | Wildman-Crippen molar refractivity.                                         |
| <b>MolWt</b>                        | Structural | The average molecular weight of the molecule.                               |
| <b>NHOH Count</b>                   | Structural | The number of NHs or OHs.                                                   |
| <b>NO Count</b>                     | Structural | The number of Nitrogens and Oxygens.                                        |
| <b><math>n_{alcarb}</math></b>      | Structural | The number of aliphatic carbocycles.                                        |
| <b><math>n_{alihet}</math></b>      | Structural | The number of aliphatic heterocycles.                                       |
| <b><math>n_{alirig}</math></b>      | Structural | The number of aliphatic rings.                                              |
| <b><math>n_{arocarb}</math></b>     | Structural | The number of aromatic carbocycles.                                         |
| <b><math>n_{arohet}</math></b>      | Structural | The number of aromatic heterocycles.                                        |
| <b><math>n_{arorig}</math></b>      | Structural | The number of aromatic rings.                                               |
| <b><math>n_{Ha}</math></b>          | Structural | The number of Hydrogen Bond Acceptors.                                      |
| <b><math>n_{Hd}</math></b>          | Structural | The number of Hydrogen Bond Donors.                                         |
| <b><math>n_{het}</math></b>         | Structural | The number of Heteroatoms.                                                  |
| <b><math>n_{radele}</math></b>      | Structural | The number of radical electrons.                                            |

|                                   |              |                                                                                            |
|-----------------------------------|--------------|--------------------------------------------------------------------------------------------|
| <b><math>n_{rot}</math></b>       | Structural   | The number of Rotatable Bonds.                                                             |
| <b><math>n_{satrig}</math></b>    | Structural   | The number of saturated rings.                                                             |
| <b><math>n_{ele}</math></b>       | Structural   | The number of valence electrons.                                                           |
| <b>PEOE_VSA1 – PEOE_VSA14</b>     | Surface Area | MOE-type (QSAR model) descriptors using partial charges and surface area contributions.    |
| <b>SMR_VSA1 – SMR_VSA10</b>       | Surface Area | MOE-type (QSAR model) descriptors using MR contributions and surface area contributions.   |
| <b>SlogP_VSA1 – SlogP_VSA12</b>   | Surface Area | MOE-type (QSAR model) descriptors using logP contributions and surface area contributions. |
| <b>TPSA</b>                       | Surface Area | The total polar surface area of a molecule based upon fragment calculations.               |
| <b>VSA_EState1 – VSA_EState10</b> | Surface Area | MOE-type (QSAR model) descriptors using EState indices and surface area contributions.     |

## Experimental Descriptor List

Experimental descriptors used in Machine Learning model development (Table S2) retrieved from each bibliographical source. Specific solvent parameters were in particular retrieved from the Minnesota Solvent Descriptor Database <sup>21</sup>.

**Table S2**

List of experimental descriptors used in machine learning model development.

| <b>Descriptor</b>           | <b>Type</b>  | <b>Meaning</b>                                |
|-----------------------------|--------------|-----------------------------------------------|
| <b>Temp_K</b>               | Experimental | Reaction temperature in Kelvin.               |
| <b>Yield</b>                | Experimental | Reaction yield.                               |
| <b>EE</b>                   | Experimental | Reaction enantiomeric excess.                 |
| <b>Configuration</b>        | Experimental | Product geometrical configuration.            |
| <b>Substrate_quant_mmol</b> | Experimental | Quantity of reaction substrate in mmol.       |
| <b>Catalyst_quant_mmol</b>  | Experimental | Quantity of reaction catalyst in mmol.        |
| <b>Ligand_quant_mmol</b>    | Experimental | Quantity of reaction catalyst ligand in mmol. |
| <b>Oxidant_quant_mmol</b>   | Experimental | Quantity of reaction oxidant in mmol.         |
| <b>Additive_quant_mL</b>    | Experimental | Volume of reaction additive in mL.            |

|                        |              |                                                                                                      |
|------------------------|--------------|------------------------------------------------------------------------------------------------------|
| <b>Solution_vol_mL</b> | Experimental | Volume of reaction solution in mL.                                                                   |
| <b>Time_h</b>          | Experimental | Reaction duration in hours.                                                                          |
| <b>Solvent</b>         | Experimental | Reaction solvent.                                                                                    |
| <b>Solv_opt_freq20</b> | Experimental | Solvent index of refraction at optical frequencies at 293 K.                                         |
| <b>Solv_opt_freq25</b> | Experimental | Solvent index of refraction at optical frequencies at 298 K.                                         |
| <b>Solv_Hbond_ac</b>   | Experimental | Solvent Abraham's hydrogen bond acidity.                                                             |
| <b>Solv_Hbond_bs</b>   | Experimental | Solvent Abraham's hydrogen bond basicity.                                                            |
| <b>Solv_surf_tens</b>  | Experimental | Solvent surface tension.                                                                             |
| <b>Solv_diele_cst</b>  | Experimental | Solvent dielectric constant at 298 K.                                                                |
| <b>Solv_aromcity</b>   | Experimental | Solvent aromaticity: fraction of non-hydrogenic solvent atoms that are aromatic carbon atoms.        |
| <b>Solv_elect_halo</b> | Experimental | Solvent electronegative halogenicity: fraction of non-hydrogenic solvent atoms that are F, Cl, or Br |

## References

- (1) Ferraz-Caetano, J.; Teixeira, F.; Cordeiro, M. N. Systematic Development of Vanadium Catalysts for Sustainable Epoxidation of Small Alkenes and Allylic Alcohols. *International Journal of Molecular Sciences* **2023**, *24* (15). DOI: 10.3390/ijms241512299.
- (2) Alvarez, H. M.; de Andrade, J. L.; Pereira, N.; Muri, E. M. F.; Horn, A.; Barbosa, D. P.; Antunes, O. A. C. Catalytic oxidation of isosafrol by vanadium complexes. *Catalysis Communications* **2007**, *8* (9), 1336-1340. DOI: <https://doi.org/10.1016/j.catcom.2006.11.021>.
- (3) Barlan, A. U.; Zhang, W.; Yamamoto, H. Development and application of versatile bis-hydroxamic acids for catalytic asymmetric oxidation. *Tetrahedron* **2007**, *63* (27), 6075-6087. DOI: <https://doi.org/10.1016/j.tet.2007.03.071>.
- (4) Bolm, C.; Kühn, T. Asymmetric Epoxidation of Allylic Alcohols Using Vanadium Complexes of (N)-Hydroxy-[2.2]paracyclophane-4-carboxylic Amides. *Synlett* **2000**, *2000* (06), 0899-0901. DOI: 10.1055/s-2000-6702.
- (5) Bourhani, Z.; Malkov, A. V. Ligand-accelerated vanadium-catalysed epoxidation in water. *Chemical Communications* **2005**, (36), 4592-4594, 10.1039/B509436D. DOI: 10.1039/B509436D.
- (6) Bryliakov, K. P.; Talsi, E. P.; Stas'ko, S. N.; Kholdeeva, O. A.; Popov, S. A.; Tkachev, A. V. Stereoselective oxidation of linalool with tert-butyl hydroperoxide, catalyzed by a vanadium(V) complex with a chiral terpenoid ligand. *Journal of Molecular Catalysis A: Chemical* **2003**, *194* (1), 79-88. DOI: [https://doi.org/10.1016/S1381-1169\(02\)00527-7](https://doi.org/10.1016/S1381-1169(02)00527-7).
- (7) Ghaffari, A.; Behzad, M.; Dutkiewicz, G.; Kubicki, M.; Salehi, M. Crystal structure, electrochemistry, and catalytic studies of a series of new oxidovanadium(IV) Schiff-base complexes derived from 1,2-diphenyl-1,2-ethylenediamine. *Journal of Coordination Chemistry* **65** (5), 840-855. DOI: 10.1080/00958972.2012.662275.
- (8) Han, L.; Liu, C.; Zhang, W.; Shi, X.-X.; You, S.-L. Dearomatization of tryptophols via a vanadium-catalyzed asymmetric epoxidation and ring-opening cascade. *Chemical Communications* **2014**, *50* (10), 1231-1233, 10.1039/C3CC47921H. DOI: 10.1039/C3CC47921H.
- (9) Makita, N.; Hoshino, Y.; Yamamoto, H. Asymmetric Epoxidation of Homoallylic Alcohols and Application in a Concise Total Synthesis of (-)- $\alpha$ -Bisabolol and (-)-8-epi- $\alpha$ -Bisabolol. *Angewandte Chemie International Edition* **2003**, *42* (8), 941-943. DOI: <https://doi.org/10.1002/anie.200390250> (accessed 2023/11/07).
- (10) Malkov, A. V.; Czemerys, L.; Malyshev, D. A. Vanadium-Catalyzed Asymmetric Epoxidation of Allylic Alcohols in Water. *The Journal of Organic Chemistry* **2009**, *74* (9), 3350-3355. DOI: 10.1021/jo900294h.
- (11) Michaelson, R. C.; Palermo, R. E.; Sharpless, K. B. Chiral hydroxamic acids as ligands in the vanadium catalyzed asymmetric epoxidation of allylic alcohols by tert-butyl hydroperoxide.



*Journal of the American Chemical Society* **1977**, *99* (6), 1990-1992. DOI: 10.1021/ja00448a059.

(12) Monfared, H. H.; Bikas, R.; Mayer, P. Homogeneous green catalysts for olefin oxidation by mono oxovanadium(V) complexes of hydrazone Schiff base ligands. *Inorganica Chimica Acta* **2010**, *363* (11), 2574-2583. DOI: <https://doi.org/10.1016/j.ica.2010.04.046>.

(13) Murase, N.; Hoshino, Y.; Oishi, M.; Yamamoto, H. Chiral Vanadium-Based Catalysts for Asymmetric Epoxidation of Allylic Alcohols. *The Journal of Organic Chemistry* **1999**, *64* (2), 338-339. DOI: 10.1021/jo9821933.

(14) Pereira, C.; Leite, A.; Nunes, A.; Rebelo, S. L. H.; Rangel, M.; Freire, C. Oxidovanadium(IV) Complexes of 3-Hydroxy-4-pyrone and 3-Hydroxy-4-pyridinone Ligands: A New Generation of Homogeneous Catalysts for the Epoxidation of Geraniol. *Catalysis Letters* **2010**, *135* (1), 98-104. DOI: 10.1007/s10562-010-0281-8.

(15) Sheng, M. N.; Zajacek, J. G. Hydroperoxide oxidations catalyzed by metals. III. Epoxidation of dienes and olefins with functional groups. *The Journal of Organic Chemistry* **1970**, *35* (6), 1839-1843. DOI: 10.1021/jo00831a027.

(16) Zhang, W.; Yamamoto, H. Vanadium-Catalyzed Asymmetric Epoxidation of Homoallylic Alcohols. *Journal of the American Chemical Society* **2007**, *129* (2), 286-287. DOI: 10.1021/ja067495y.

(17) Zhang, W.; Basak, A.; Kosugi, Y.; Hoshino, Y.; Yamamoto, H. Enantioselective Epoxidation of Allylic Alcohols by a Chiral Complex of Vanadium: An Effective Controller System and a Rational Mechanistic Model. *Angewandte Chemie International Edition* **2005**, *44* (28), 4389-4391. DOI: <https://doi.org/10.1002/anie.200500938> (accessed 2023/11/07).

(18) *RDKit: Open-source cheminformatics - Descriptor Webbook*. <https://www.rdkit.org/docs/GettingStartedInPython.html#list-of-available-descriptors> (accessed March 1, 2022).

(19) *Python Software Foundation - Python Language Reference, version 3.9.8*. <http://www.python.org> (accessed).

(20) Landrum, G. *RDKit: Open-source cheminformatics 2022\_09\_4 (Q3 2022) Release - January 16, 2023*. 2023. <http://www.rdkit.org/> (accessed January 18, 2023).

(21) Marenich, A. V. K., Casey P; Thompson, Jason D; Hawkins, Gregory D; Chambers, Candee C; Giesen, David J; Winget, Paul; Cramer, Christopher J; Truhlar, Donald G. *Minnesota Solvation Database (MNSOL) version 2012*. Retrieved from the Data Repository for the University of Minnesota. 2020. <https://doi.org/10.13020/3eks-j059>. (accessed).
